# Supplementary material for: Hyperglycaemia induces metabolic dysfunction and glycogen accumulation in pancreatic β-cells
Source: PubMed Central journal article supplement (PMC5123088; doi:10.1038/ncomms13496), 2016-11-24
Supplement: ncomms13496-s1.pdf [file ncomms13496-s1.pdf]

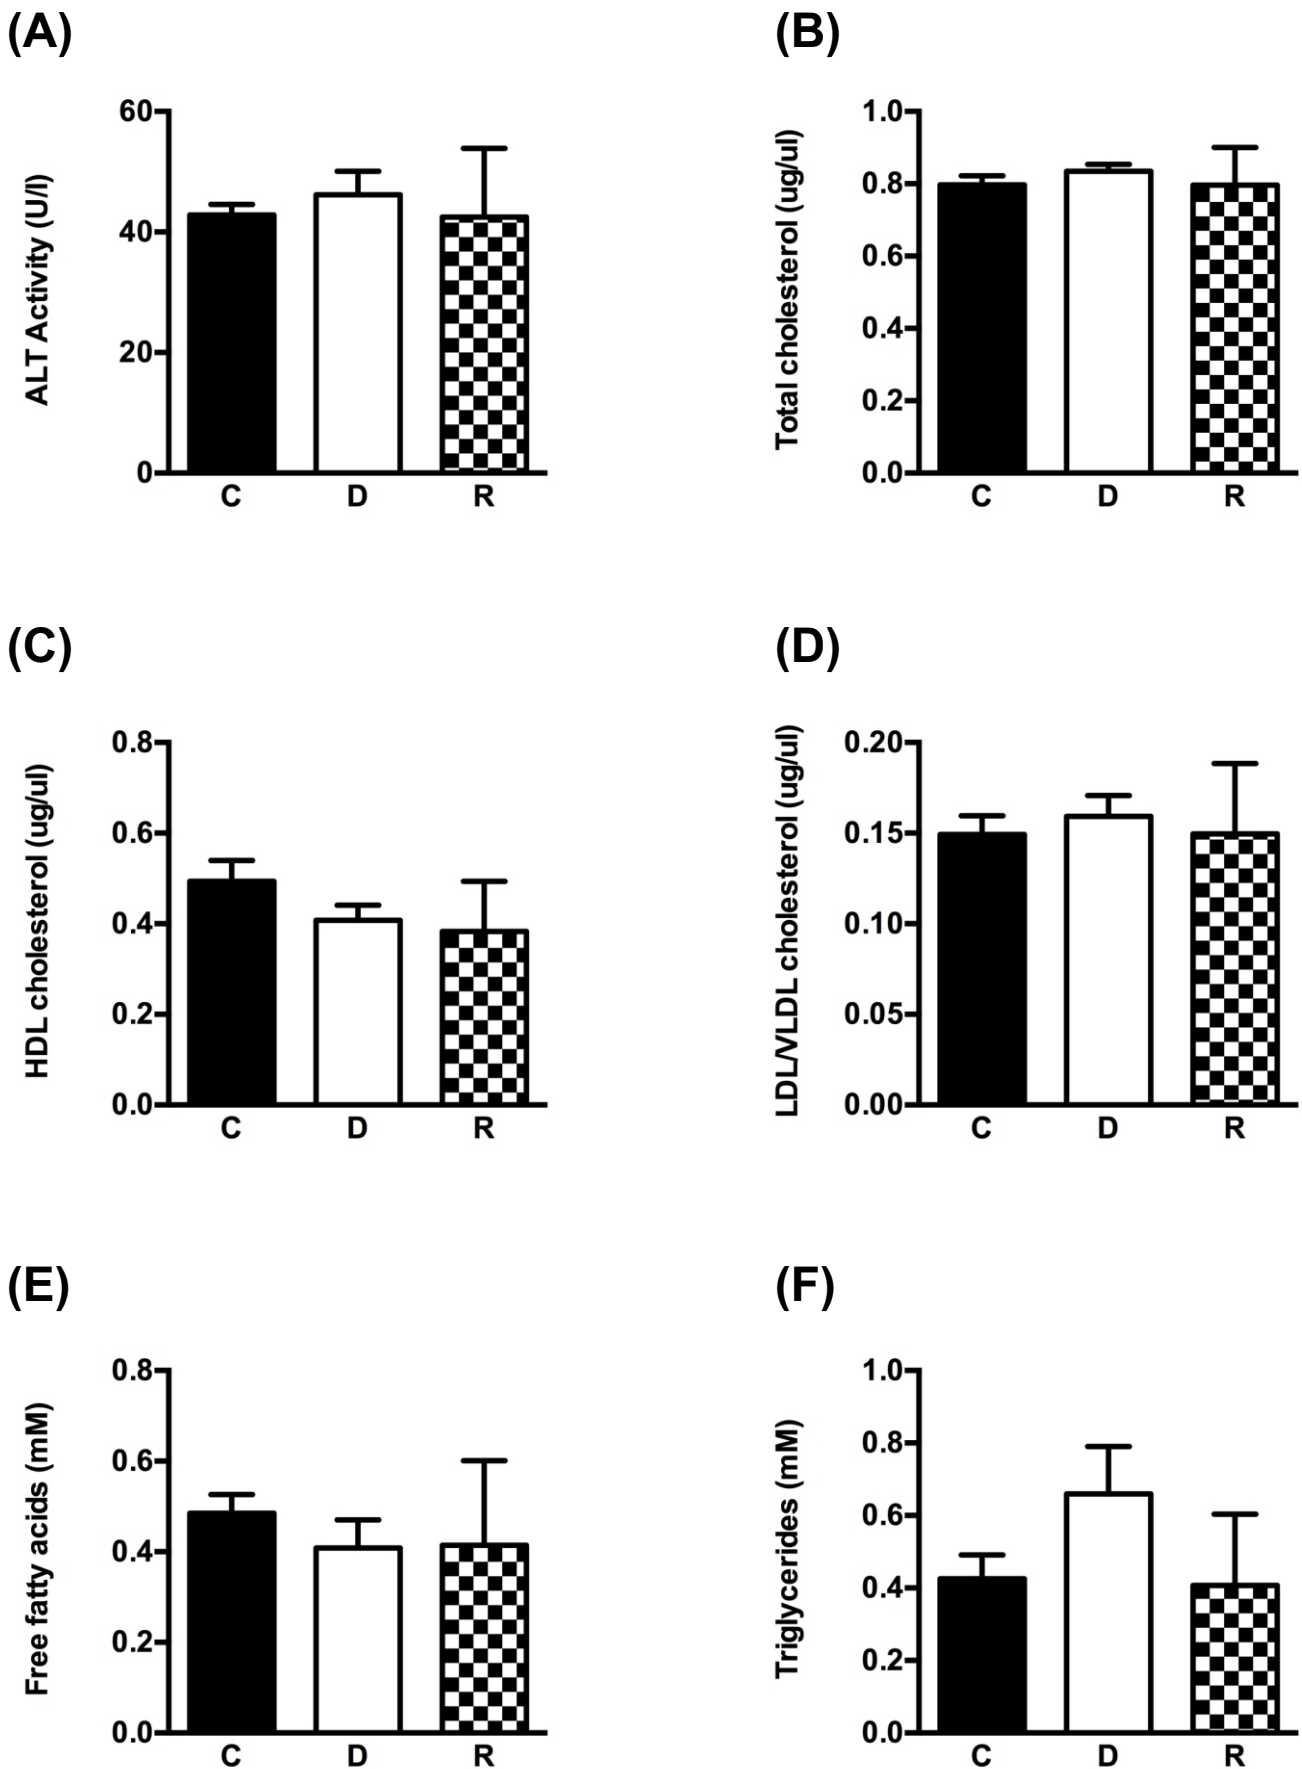

### Supplementary Figure 1. Lipid profile in $\beta V59M$ mice

Alanine aminotransferase (ALT) activity (A), total cholesterol (B), HDL cholesterol (C), LDL/VLDL cholesterol (D), free fatty acids (E), and triglyceride levels (F) in control mice (black bars),  $\beta V59M$  mice 2-4 weeks after diabetes onset, or after 2-4 weeks of diabetes followed by 2 weeks of glibenclamide therapy (hatched bars). Data are mean  $\pm$  SEM, n=7-20 per genotype.

(A)

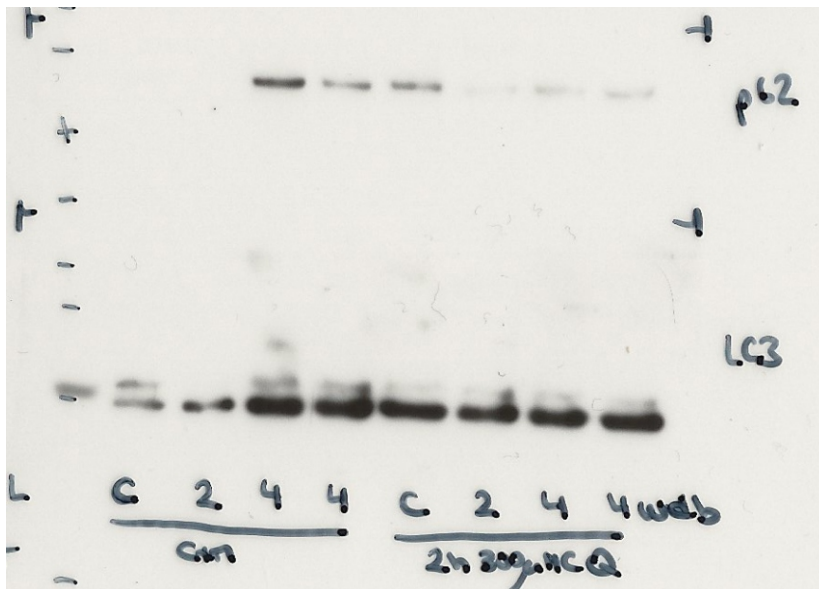

(B)

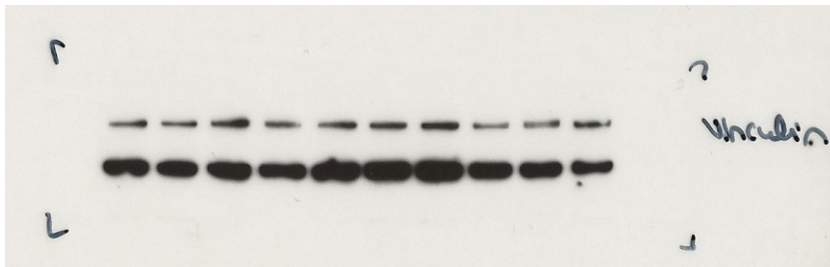

**Supplementary Figure 2. Original Western blot images for Figure 5E**  
(A) Western blot image for p62 and LC3B. (B) Western blot image for vinculin.

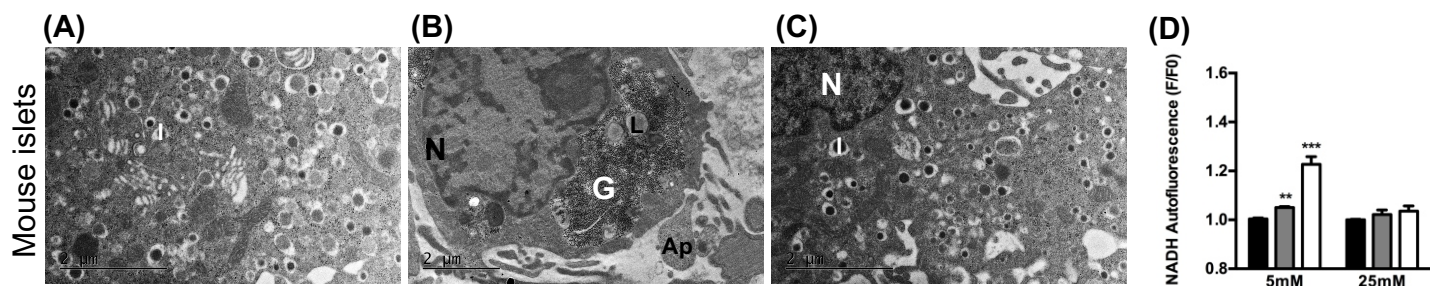

### Supplementary Figure 3. Control mouse islets accumulate glycogen *in vitro*

(A-C) Representative electron micrographs of isolated islets from control mice following 48 hours culture in 5mM glucose (A), 25mM glucose (B), or 48h hours in 25mM glucose followed by 24 hours in 5mM glucose (C). Data are representative of islets from 3 patients. I, insulin granule. N, nucleus. Ap, apoptotic body. G, glycogen granules. L, lysosome. Scale bars 2 $\mu$ m. (D) Mean ( $\pm$ SEM) NAD(P)H autofluorescence produced by 1mM (black bars) 6mM (grey bars) and 20mM glucose (white bars) in islets isolated from control mice and cultured at 5mM glucose or 25mM glucose for 72 hours prior to the experiment (n=4-5).

**(A)**

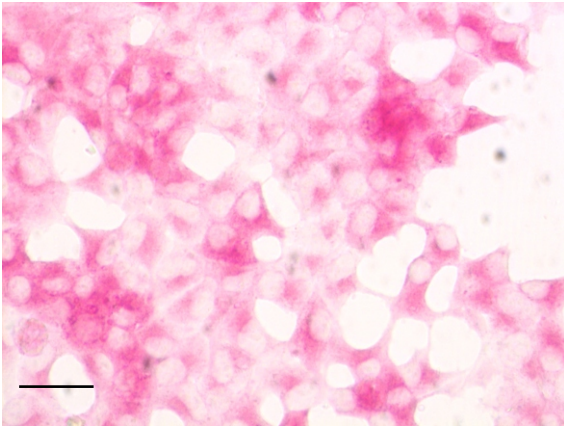

**(B)**

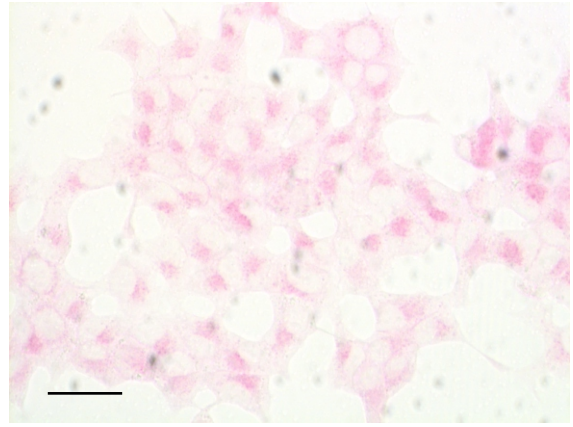

**Supplementary Figure 4. Glycogen dissipates from INS-1 cells upon return to low glucose**

**(A,B)** Representative images of INS1 cells following 48 hours culture in **(A)** 25mM glucose and **(B)** 48 hours culture in 25mM glucose followed by 24 hours at 5mM glucose. Scale bar, 200 $\mu$ m. Data are representative of >3 separate experiments.

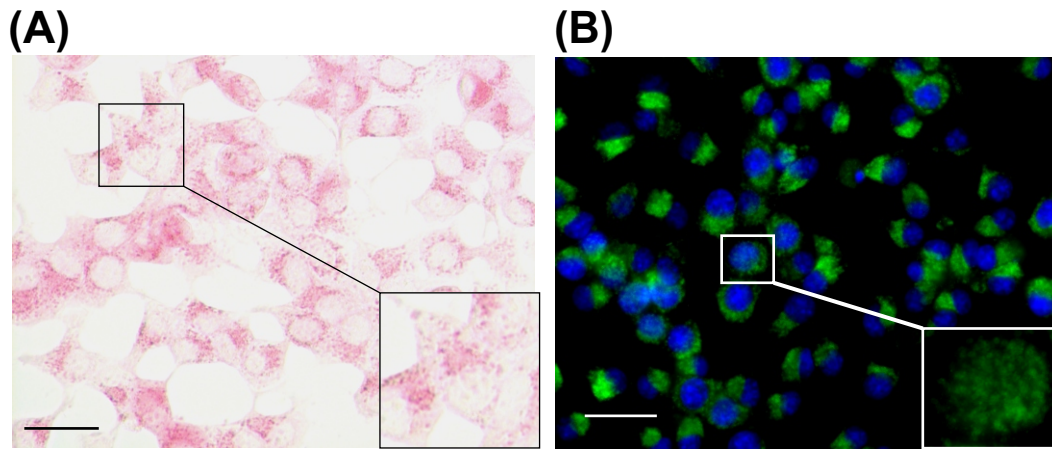

**Supplementary Figure 5. Glycogen accumulates in lysosomes in INS-1 cells**  
(**A,B**) Representative images of INS-1 cells following 48 hours culture in 25mM glucose plus the lysosomal inhibitors pepstatin A (10 $\mu$ g/ml) and E-64d (10 $\mu$ g/ml). (**A**) PAS-staining for glycogen. (**B**) Immunofluorescence staining for the lysosomal marker Lamp-2 (green). Inset shows Lamp-2 positive punctae. Scale bar, 200 $\mu$ m. Data are representative of >3 separate experiments.

**(A)**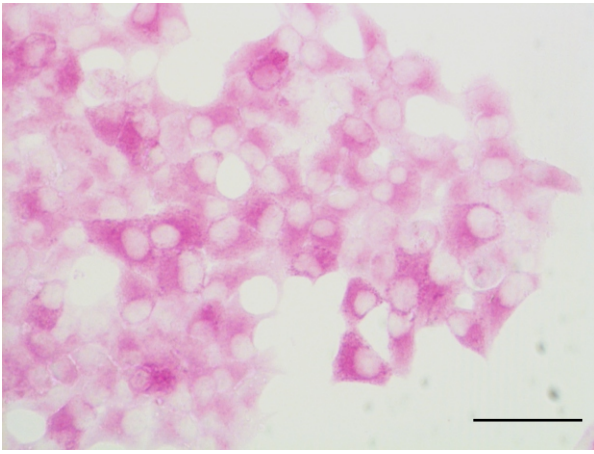**(B)**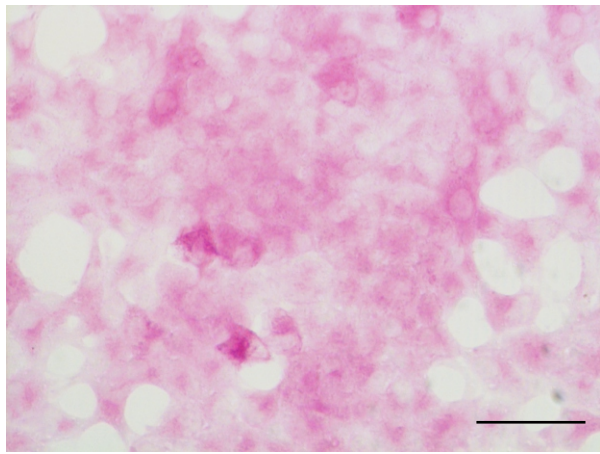**(C)**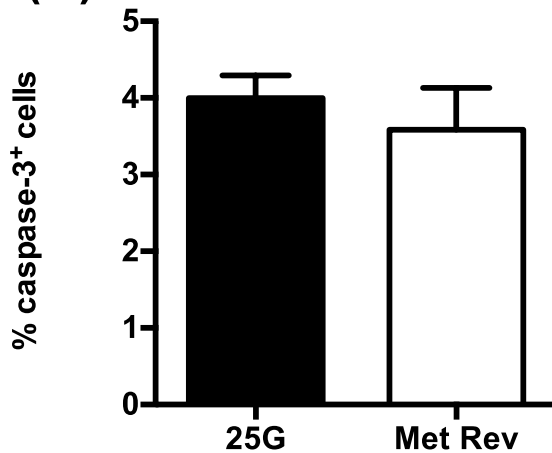

### Supplementary Figure 6. Metformin treatment does not reverse glycogen formation

(A,B) Representative images of INS-1 cells following 48 hours culture in (A) 25mM glucose or (B) 48 hours at 25mM glucose then 24-hours with 25mM glucose plus metformin (0.5mM). Scale bar, 200 $\mu$ m. Data are representative of >3 separate experiments. (C) Mean $\pm$ SEM number of cleaved-caspase-3 positive INS-1 cells as a percentage of the total number of INS-1 cells (n=25 fields of view from 3 experiments) in cells cultured for 48 hours in 25mM glucose (black bars), or 48 hours at 25mM glucose then 24-hours with 25mM glucose plus metformin (white bars).

(A)

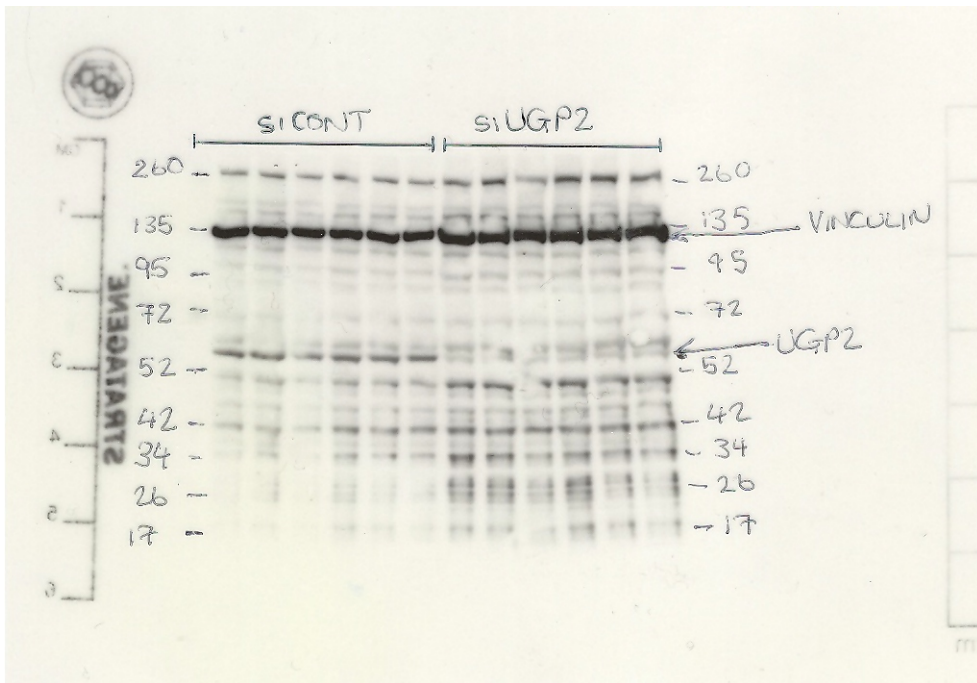

(B)

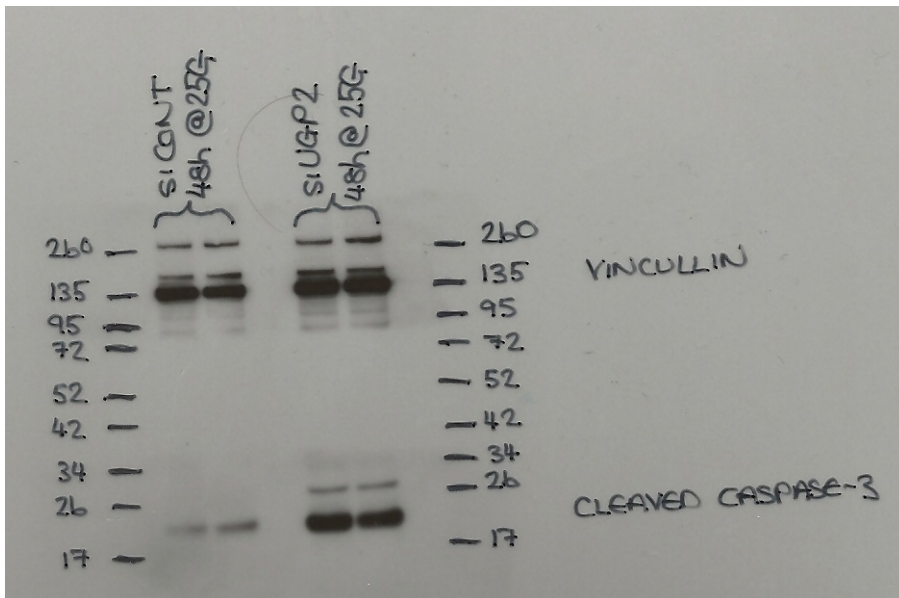

**Supplementary Figure 7. Original Western blot images for Figure 7**

(A) Western blot image for UGP2 and vinculin. (B) Western blot image for cleaved caspase-3 and vinculin.

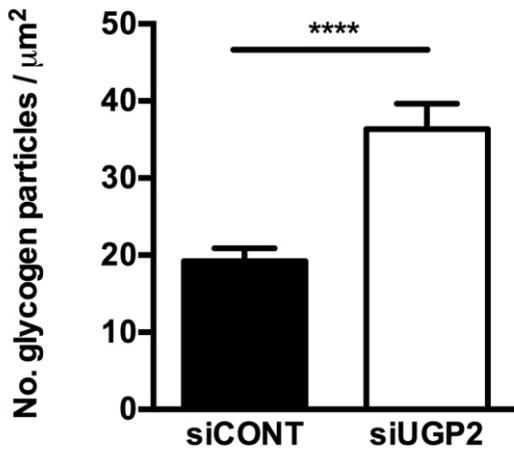

**Supplementary Figure 8. Silencing UGP-2 increases glycogen content**

Mean ( $\pm$ SEM) number of glycogen particles identified from  $n=31$  cells using electron microscopy in INS-1 cells 72h post UGP2 knockdown that were cultured for 48h at 25mM glucose. siCONTROL (black bar) and siUGP2 (white bar) treated cells.

\*\*\* $p < 0.001$  (Mann-Whitney test).



**(A)**

| Gene Symbol | Gene Name                                                | Control | 2wk  | Fold change |
|-------------|----------------------------------------------------------|---------|------|-------------|
| Aldob       | Aldolase B, fructose-bisphosphate                        | 389     | 5496 | 14.4        |
| Fbp1        | Fructose bisphosphatase 1                                | 986     | 3851 | 4.3         |
| Pfkfb3      | 6-phosphofructo-2-kinase/fructose-2,6-biphosphatase 3    | 289     | 1206 | 4.2         |
| Pdk1        | Pyruvate dehydrogenase kinase, isoenzyme 1               | 770     | 2770 | 3.6         |
| Fbp2        | Fructose bisphosphatase 2                                | 191     | 556  | 2.8         |
| Acaca       | Acetyl-Coenzyme A carboxylase alpha                      | 334     | 929  | 2.8         |
| Ppp1r3c     | Protein phosphatase 1, regulatory (inhibitor) subunit 3C | 219     | 470  | 2.2         |
| Pgm2l1      | Phosphoglucomutase 2-like 1                              | 255     | 544  | 2.1         |
| Idh1        | Isocitrate dehydrogenase 1 (NADP+), soluble              | 1475    | 2995 | 2.1         |

**(B)**

| Gene Symbol | Gene Name                                             | Control | 2wk  | Fold change |
|-------------|-------------------------------------------------------|---------|------|-------------|
| Cox6a2      | Cytochrome c oxidase, subunit VI a, polypeptide 2     | 2896    | 333  | 6.3         |
| Eno2        | Enolase                                               | 1471    | 742  | 2.0         |
| Fah         | Fumarylacetoacetate hydrolase                         | 1345    | 708  | 1.9         |
| Pfkfb2      | 6-phosphofructo-2-kinase/fructose-2,6-biphosphatase 2 | 2592    | 1420 | 1.8         |
| G6pc2       | Glucose-6-phosphatase, catalytic, 2                   | 13186   | 7235 | 1.8         |
| ATP6        | ATP synthase F0 subunit 6 /// predicted gene 10925    | 2226    | 1286 | 1.8         |
| Ogdhl       | Oxoglutarate dehydrogenase-like                       | 2293    | 1328 | 1.7         |

**Supplementary Table 1. Summary of microarray data**

Selected metabolic genes that are significantly up-regulated **(A)** or down-regulated **(B)** in  $\beta$ V59M mice after 2 of weeks of diabetes compared to littermate controls.

| <b>Taqman Primers</b> |                                              |
|-----------------------|----------------------------------------------|
| <b>Gene</b>           | <b>Catalogue number (Applied Biosystems)</b> |
| <i>Actb</i>           | Mm00607939_s1                                |
| <i>ATP6</i>           | Mm03649417_g1<br>Rn03296710_s1               |
| <i>Becn1</i>          | Mm01265461_m1                                |
| <i>Cox6a2</i>         | Mm00438295_g1                                |
| <i>Fhl1</i>           | Mm01321349_m1                                |
| <i>Fbp1</i>           | Mm00490181_m1<br>Rn00561189_m1               |
| <i>Fbp2</i>           | Mm00484280_m1                                |
| <i>G6pc2</i>          | Mm00491176_m1<br>qRnoCIP0033113 (Bio-Rad)    |
| <i>G6pd2</i>          | Mm00658204_s1                                |
| <i>Gsk3b</i>          | Mm00444911_m1<br>Rn01444108_m1               |
| <i>Gys1</i>           | Mm01962575_s1<br>Rn01476417_m1               |
| <i>Gys2</i>           | Mm0523953_m1<br>Rn00565296_m1                |
| <i>Ogdhl</i>          | Mm01221916_m1                                |
| <i>Pdk1</i>           | Mm00554306_m1                                |
| <i>Pfkfb2</i>         | Mm00435575_m1                                |
| <i>Pgm2l1</i>         | Rn01508647_m1                                |
| <i>Ppp1r3c</i>        | Mm01204084_m1                                |
| <i>Pygl</i>           | Mm01289790_m1                                |
| <i>Pygm</i>           | Mm00478582_m1                                |
| <i>Ugp2</i>           | Rn01434170_m1                                |

Supplementary Table 2: Taqman primer assay ID for the indicated genes.

| <b>Antibody</b>                        | <b>Concentration</b> | <b>Source</b>                 | <b>Application</b>                                        | <b>Source</b>                 |
|----------------------------------------|----------------------|-------------------------------|-----------------------------------------------------------|-------------------------------|
| <i>Guinea pig anti-insulin</i>         | 1:500                | Made in house                 | Immunohistochemistry                                      | Made in house                 |
| <i>Mouse anti-glucagon</i>             | 1:500                | Sigma (2645)                  | Immunohistochemistry                                      | Sigma (2645)                  |
| <i>Rabbit anti-cleaved caspase-3</i>   | 1:100, 1:1000        | Cell signalling (9664)        | Immunohistochemistry, Western blot                        | Cell signalling (9664)        |
| <i>Rabbit anti-LAMP2</i>               | 1:200                | Sigma (L0668)                 | Immunohistochemistry                                      | Sigma (L0668)                 |
| <i>Mouse anti-ubiquitin</i>            | 1:100                | MBL (Clone IB3)               | Immunohistochemistry                                      | MBL (Clone IB3)               |
| <i>Rabbit anti-p62</i>                 | 1:500                | MBL (PM045)                   | Immunohistochemistry, Western Blot, Immuno-gold labelling | MBL (PM045)                   |
| <i>Rabbit anti-LC3B</i>                | 1:1000               | Abcam (ab48394)               | Western Blot                                              | Abcam (ab48394)               |
| <i>Rabbit anti-vinculin</i>            | 1:5000               | Abcam (ab18058)               | Western Blot                                              | Abcam (ab18058)               |
| <i>Rabbit anti-UGP2</i>                | 1:500                | Abcam (ab10627)               | Western Blot                                              | Abcam (ab10627)               |
| <i>Anti-guinea pig Texas red</i>       | 1:50                 | Vector Laboratories (TI-7000) | Immunohistochemistry                                      | Vector Laboratories (TI-7000) |
| <i>Anti-mouse Alexa 633</i>            | 1:500                | ThermoFisher (A-21046)        | Immunohistochemistry                                      | ThermoFisher (A-21046)        |
| <i>Anti-rabbit Alexa 488</i>           | 1:200                | ThermoFisher (A-11034)        | Immunohistochemistry                                      | ThermoFisher (A-11034)        |
| <i>ECL Anti-rabbit IgG, HRP linked</i> | 1:2500               | GE Healthcare (NA934V)        | Western Blot                                              | GE Healthcare (NA934V)        |

Supplementary Table 3: Antibodies.
